# Supplementary material
Source: publisher figshare collection journal article supplement (https://acs.figshare.com/ndownloader/files/22023561)
Supplement: Supplementary file 1 [file 22023561]

Supporting Information

# Stable Yellow Light-Emitting Devices Based on Ternary Copper Halides with Broadband Emissive Self-Trapped Excitons

*Zhuangzhuang Ma,<sup>1</sup> Zhifeng Shi,<sup>\*1</sup> ChaoChao Qin,<sup>2</sup> Minghuan Cui,<sup>2</sup> Dongwen Yang,<sup>1</sup> Xinjiang Wang,<sup>3</sup> Lintao Wang,<sup>1</sup> Xinzheng Ji,<sup>1</sup> Xu Chen,<sup>1</sup> Junlu Sun,<sup>1,4</sup> Di Wu,<sup>1</sup> Yu Zhang,<sup>5</sup> Xin Jian Li,<sup>1</sup> Lijun Zhang,<sup>\*3</sup> and Chongxin Shan<sup>\*1</sup>*

<sup>1</sup>Key Laboratory of Materials Physics of Ministry of Education, School of Physics and Microelectronics, Zhengzhou University, Daxue Road 75, Zhengzhou 450052, China

<sup>2</sup>Henan Key Laboratory of Infrared Materials & Spectrum Measures and Applications, Henan Normal University, Jianshe Road 46, Xinxiang 453007, China

<sup>3</sup>State Key Laboratory on Integrated Optoelectronics, Key Laboratory of Automobile Materials of MOE, and College of Materials Science and Engineering, Jilin University, Qianjin Street 2699, Changchun 130012, China

<sup>4</sup>CAS Center for Excellence in Nanoscience, Beijing Key Laboratory of Micro-Nano Energy and Sensor, Beijing Institute of Nanoenergy and Nanosystems, Chinese Academy of Sciences, Beijing 100083, China

<sup>5</sup>State Key Laboratory on Integrated Optoelectronics, College of Electronic Science and Engineering, Jilin University, Qianjin Street 2699, Changchun 130012, China

---

\*Correspondence and requests for materials should be addressed to Z.S. (email: shizf@zzu.edu.cn), L.Z. (email: lijun\_zhang@jlu.edu.cn) or to C.S. (email: cxshan@zzu.edu.cn).

## Crystal structure of $\text{CsCu}_2\text{I}_3$

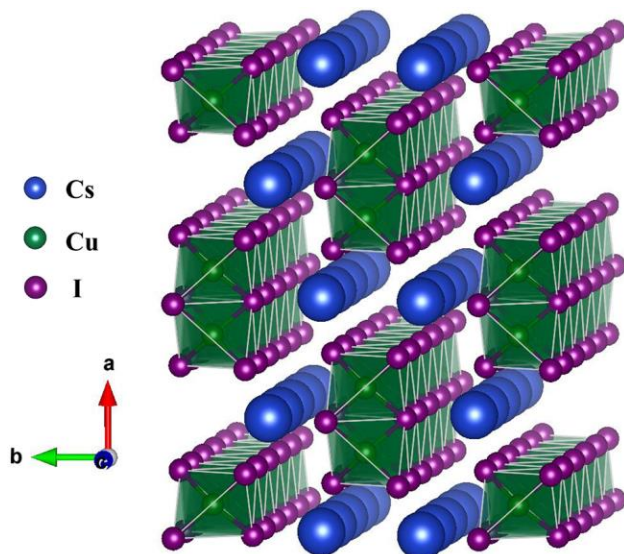

**Figure S1. One-dimensional (1D) crystal structure of  $\text{CsCu}_2\text{I}_3$  (blue: Cs atom; purple: I atom; green: Cu atom; dark green octahedron: Cu-I tetrahedron).**

## Spin-coating speed-time profile

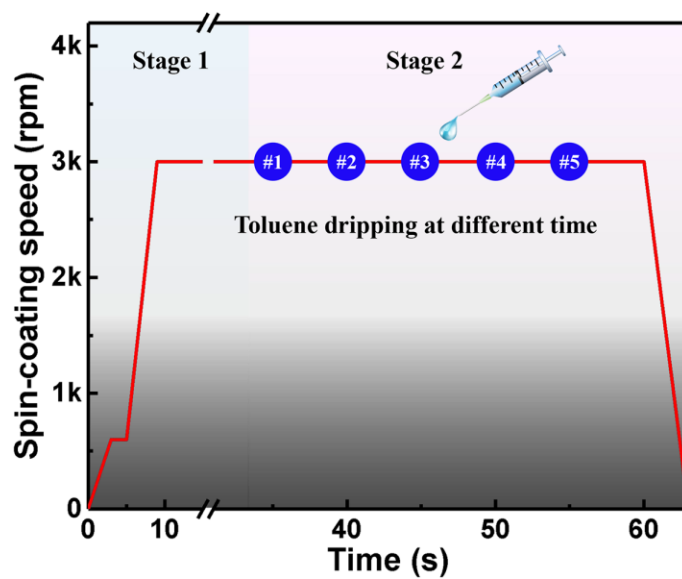

Figure S2. Spin-coating speed-time profile for preparing CsCu<sub>2</sub>I<sub>3</sub> thin films.

**Morphology of the CsCu<sub>2</sub>I<sub>3</sub> thin films prepared without the antisolvent**

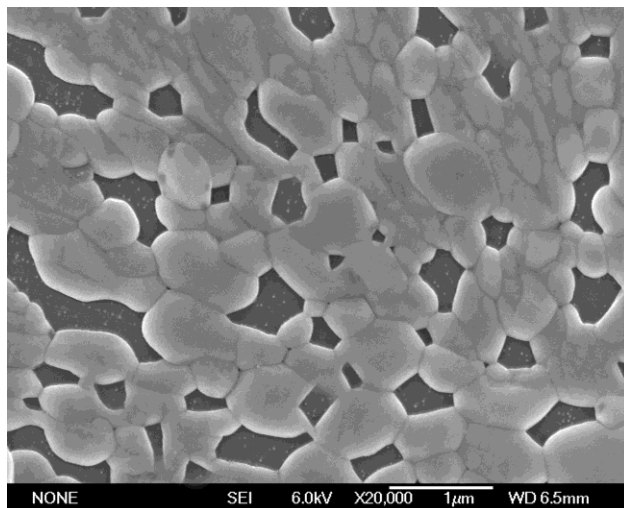

**Figure S3. SEM image of the CsCu<sub>2</sub>I<sub>3</sub> thin films prepared without toluene as the antisolvent.**

## Comparison on the surface roughness of five CsCu<sub>2</sub>I<sub>3</sub> thin films samples

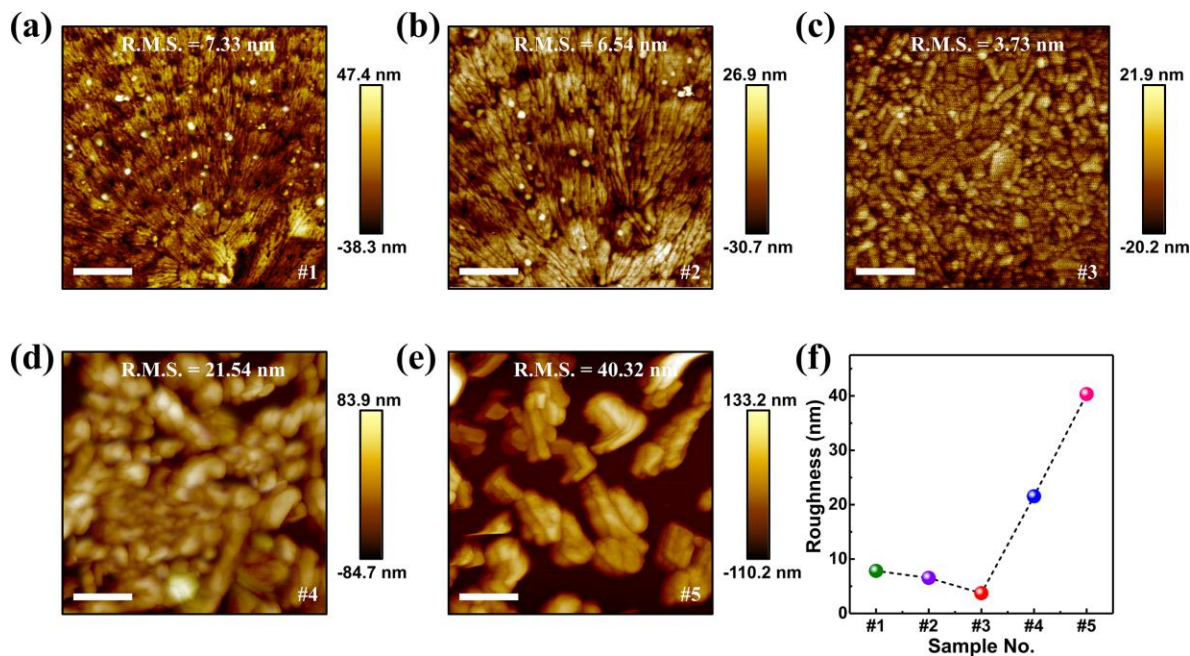

Figure S4. AFM images of the CsCu<sub>2</sub>I<sub>3</sub> thin films prepared with different dripping time of the toluene antisolvent: (a) #1, 35 s; (b) #2, 40 s; (c) #3, 45 s; (d) #4, 50 s; (e) #5, 55 s. All scale bars are 1  $\mu$ m. (f) Summary of root-mean-square roughness of the CsCu<sub>2</sub>I<sub>3</sub> thin films prepared with different conditions.

**Comparison on the PL decay behavior of five CsCu<sub>2</sub>I<sub>3</sub> thin films samples**

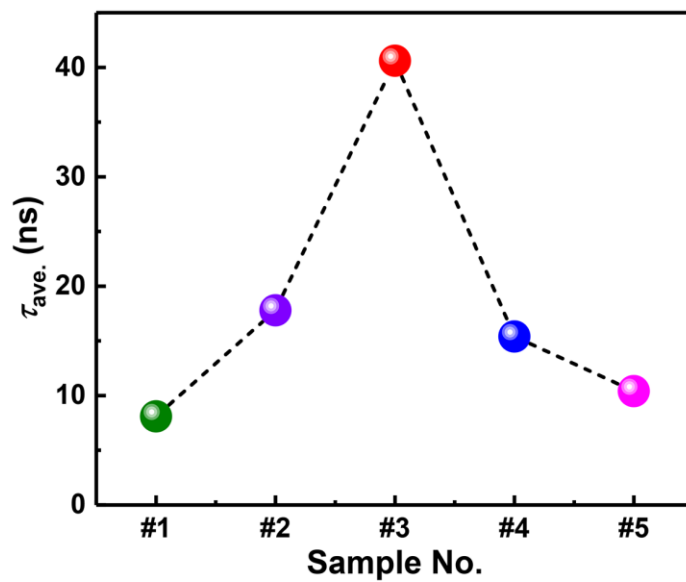

**Figure S5. Average PL lifetime of the CsCu<sub>2</sub>I<sub>3</sub> thin films obtained with different dripping time of toluene.**

### Dependence of the photon energy on the measured temperature

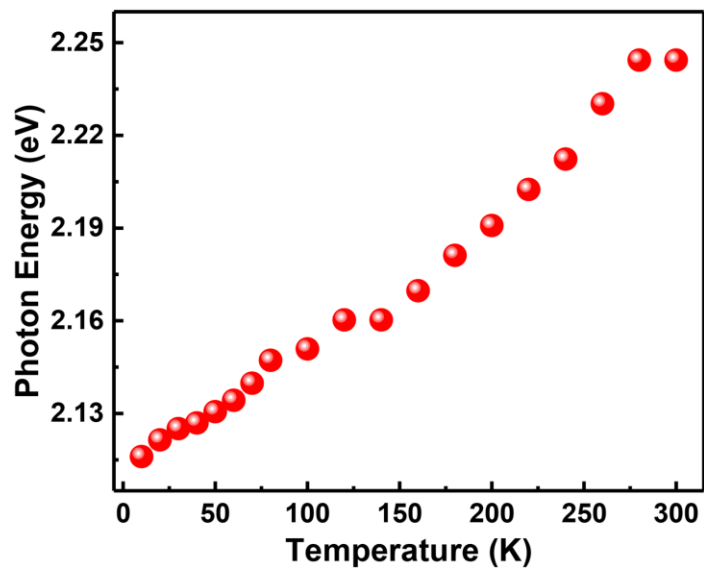

Figure S6. Shift of the photon energy of the CsCu<sub>2</sub>I<sub>3</sub> thin films as a function of measured temperature (10 to 300 K).

## Estimation of the specific formation time of STEs

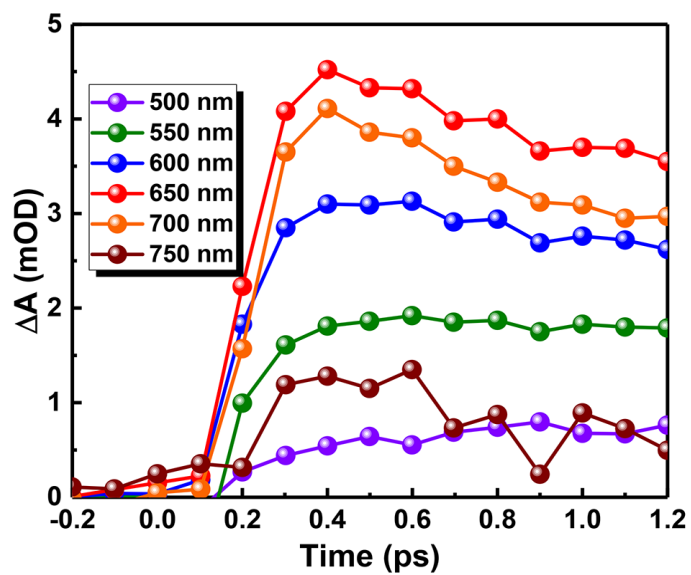

Figure S7. PIA onsets of the CsCu<sub>2</sub>I<sub>3</sub> probed at different wavelengths.



## Investigation on the excitation and emission spectra of the CsCu<sub>2</sub>I<sub>3</sub> thin films

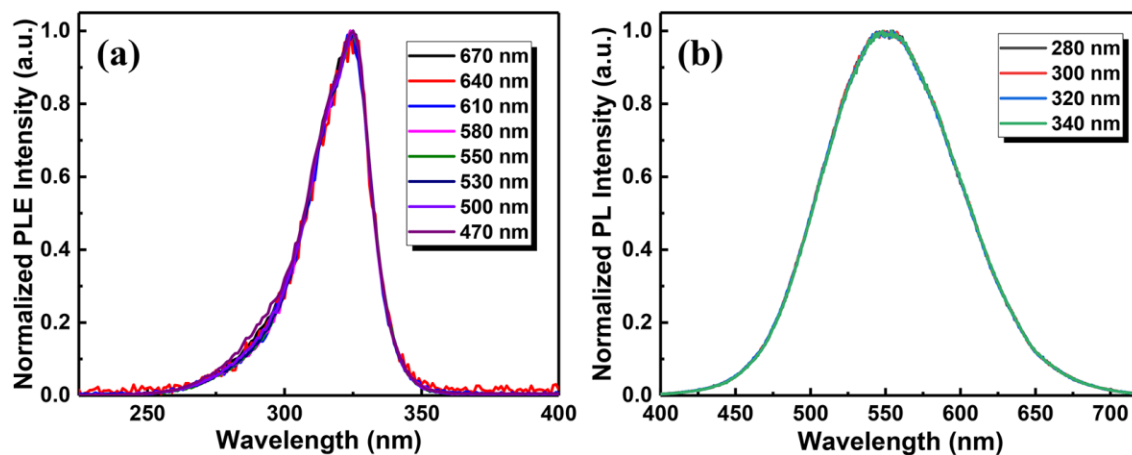

Figure S8. (a) Normalized excitation spectra of the CsCu<sub>2</sub>I<sub>3</sub> thin films for the emission from 470 to 670 nm. (b) Normalized PL spectra of the CsCu<sub>2</sub>I<sub>3</sub> thin films measured at different excitation wavelengths.

### Calculation of the structural distortion of $\text{CsCu}_2\text{I}_3$

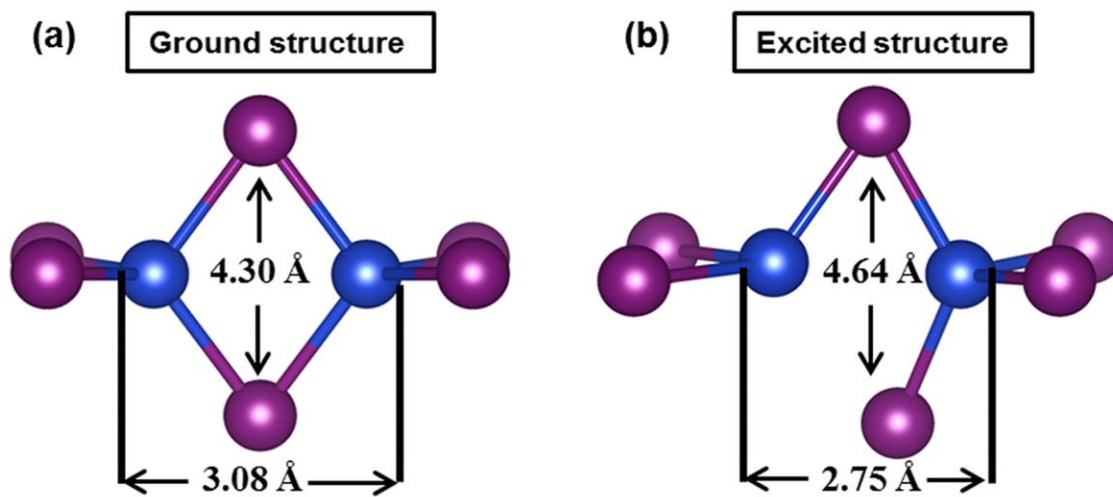

Figure S9. The geometric (a) ground state, and (b) excited state structures of  $\text{CsCu}_2\text{I}_3$ .

### Photograph of the fabricated device

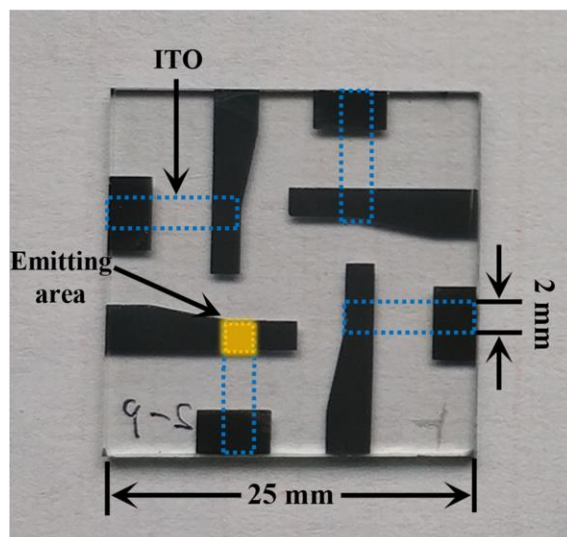

**Figure S10.** Photograph of the fabricated device consisting of four emitting units. The active area of each unit is  $2 \times 2 \text{ mm}^2$ .

## Comparison of the device performances of five devices

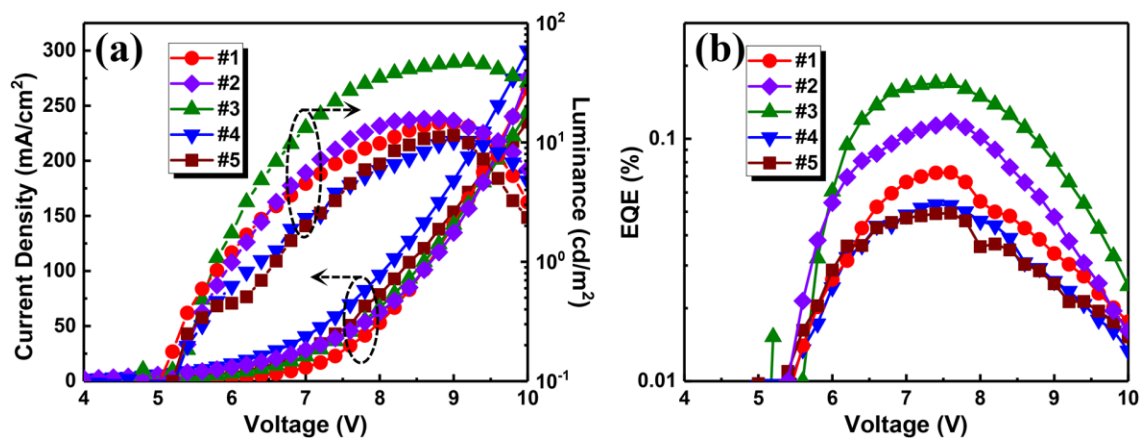

Figure S11. (a) Current density-voltage-luminance, and (b) EQE curves of the LEDs prepared with different dripping conditions of the  $\text{CsCu}_2\text{I}_3$  thin films.

## Assessment of the reproducibility of the studied LEDs

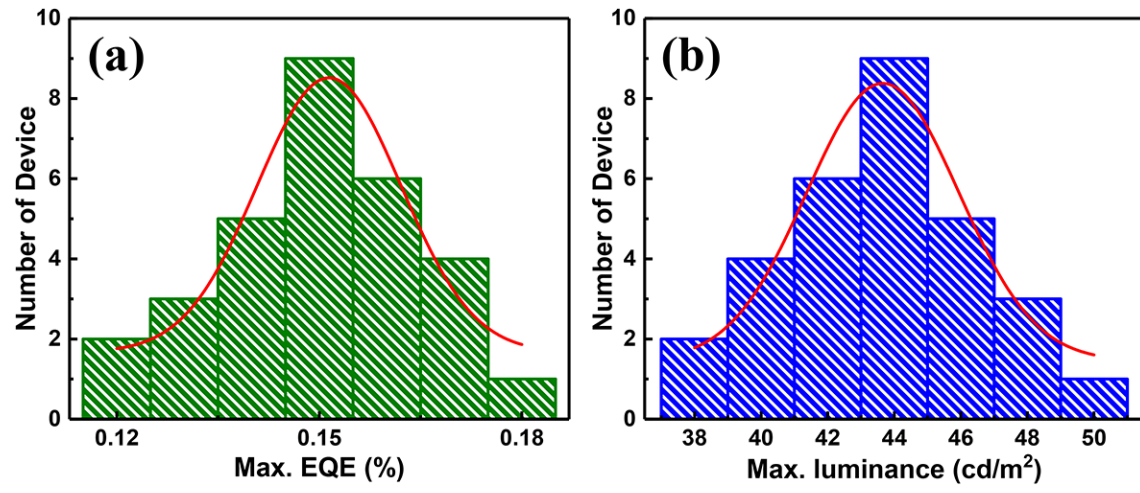

Figure S12. Statistical diagram of the (a) maximum EQE, and (b) maximum luminance measured from 30 devices with the same device structure.

**Investigation on the storage stability of the  $\text{CsCu}_2\text{I}_3$  thin films in air ambient**

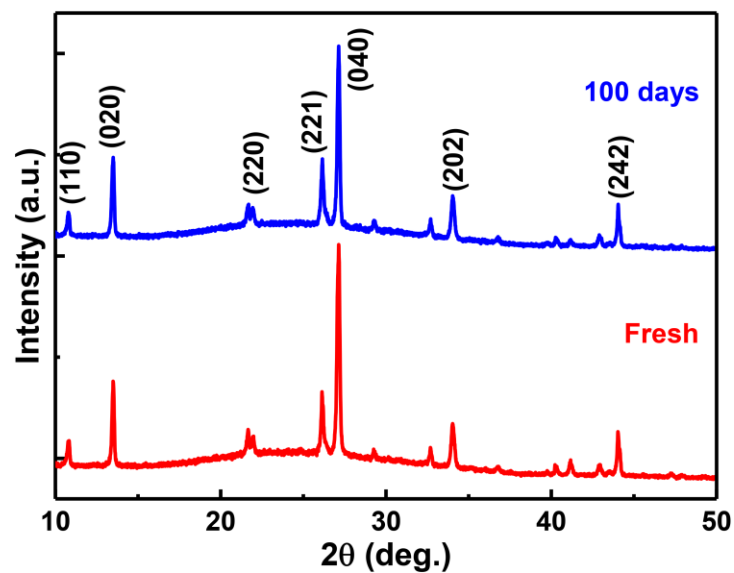

Figure S13. Comparison of the XRD patterns of the  $\text{CsCu}_2\text{I}_3$  thin films before and after storage for 100 days in air ambient.

**Table S1 The calculated bandgap, effective masses of electron and hole, excitation energy, emission energy, and the Stokes shift of CsCu<sub>2</sub>I<sub>3</sub>**

|                                  | Bandgap<br>(eV) | Effective mass<br>( $m_0$ ) |       |       | Excitation<br>energy (eV) | Emission<br>energy (eV) | Stokes shift<br>(nm)   |
|----------------------------------|-----------------|-----------------------------|-------|-------|---------------------------|-------------------------|------------------------|
| CsCu <sub>2</sub> I <sub>3</sub> | 4.02            |                             | $m_e$ | $m_h$ | 4.02                      | 2.37                    | 213.03                 |
|                                  |                 | $\Gamma \rightarrow S$      | 0.22  | 0.55  | (3.82 <sup>a</sup> )      | (2.26 <sup>a</sup> )    | (224.06 <sup>a</sup> ) |

<sup>a</sup>The experimental values are also shown in parentheses for comparison.
